# Supplementary material for: ABCB4 variant is associated with hepatobiliary MR abnormalities in people with low-phospholipid-associated cholelithiasis syndrome
Source: PubMed Central journal article supplement (PMC9582794; doi:10.1016/j.jhepr.2022.100590), 2022-09-21
Supplement: mmc1.pdf [file mmc1.pdf]

# **ABCB4 variant is associated with hepatobiliary MR abnormalities in people with low-phospholipid-associated cholelithiasis syndrome**

Moustafa Biyoukar, Christophe Corpechot, Sanaâ El Mouhadi, Edouard Chambenois, Quentin Vanderbecq, Véronique Barbu, Catherine Dong, Sara Lemoinne, Mickael Tordjman, Raphel Jomaah, Olivier Chazouilleres, Lionel Arrivé

## Table of contents

|               |   |
|---------------|---|
| Table S1..... | 2 |
| Table S2..... | 3 |
| Table S3..... | 4 |

Table S1: Number of MRCP in LPAC patients

| Number of MRCP | No Variant (n=65) | Variant (n=60) | Total    |
|----------------|-------------------|----------------|----------|
| 1              | 42 (42)           | 27 (27)        | 69 (69)  |
| 2              | 8 (16)            | 10 (20)        | 18 (36)  |
| 3              | 3 (9)             | 5 (15)         | 8 (24)   |
| 4              | 4 (16)            | 8 (32)         | 12 (48)  |
| 5              | 3 (15)            | 0 (0)          | 3 (15)   |
| More than 5    | 5 (43)            | 10 (77)        | 15 (120) |

Table S2: Radiological follow up according to ABCB4 gene status

|                  | ABCB4 variant<br>(n= 31) | No ABCB4<br>variant (n= 16) | P  |
|------------------|--------------------------|-----------------------------|----|
| Improvement (14) | 11 (35 %)                | 3 (18 %)                    |    |
| Stability (21)   | 14 (45 %)                | 7 (43 %)                    | NS |
| Worsening (12)   | 6 (19 %)                 | 6 (36 %)                    |    |

Table S3 - Genetic status in the 60 patients with ABCB4 variant

| CASE | SEX | AGE | LOCATION AND NUCLEOTIDE CHANGES | SEQUENCE VARIATIONS           | IMPORTANCE OF SEQUENCE VARIATION * | STATUS    |
|------|-----|-----|---------------------------------|-------------------------------|------------------------------------|-----------|
| 1    | F   | 43  | c.2800G>A                       | p.Ala934Thr                   | 1                                  | HTZ       |
| 2    | F   | 24  | c.140G>A & c.1217G>A            | p.Arg47Gln & p.Arg406Gln      | 1                                  | HTZ & HTZ |
| 3    | F   | 39  | c.2800G>A                       | p.Ala934Thr                   | 1                                  | HTZ       |
| 4    | M   | 51  | c.857C>T                        | p.Ala286Val                   | 2                                  | HTZ       |
| 5    | F   | 53  | c.1769G>A                       | p.Arg590Gln                   | 1                                  | HTZ       |
| 6    | F   | 64  | c.2363G>A                       | p.Arg788Gln                   | 2                                  | HTZ       |
| 7    | F   | 21  | c.139C>T & c.823A>G             | p.Arg47* & p.Thr175Ala        | 1                                  | HTZ & HTZ |
| 8    | F   | 33  | c.2869C>T                       | p.Arg957*                     | 1                                  | HTZ       |
| 9    | F   | 34  | c.3258C>A                       | p.Tyr1086*                    | 1                                  | HTZ       |
| 10   | F   | 65  | c.2471T>G                       | p.Val824Gly                   | 2                                  | HTZ       |
| 11   | F   | 41  | c;2363G>A                       | p.Arg788Gln                   | 2                                  | HTZ       |
| 12   | M   | 76  | c.1769G>A & c.2800G>A           | p.Arg590Gln & p.Ala934Thr     | 1                                  | HTZ & HTZ |
| 13   | F   | 28  | c.1015dupT                      | p.Asp355*                     | 1                                  | HTZ       |
| 14   | F   | 20  | c.1015dupT                      | p.Asp355*                     | 1                                  | HTZ       |
| 15   | F   | 23  | c.344G>T                        | p.Arg115Ile                   | 2                                  | HTZ       |
| 16   | F   | 38  | c.1633C>T                       | p.Arg545Cys                   | 1                                  | HTZ       |
| 17   | M   | 44  | c.2661dup                       | p.Glu888Argfs*17              | 1                                  | HTZ       |
| 18   | M   | 34  | c.1646G>A                       | p.Arg549His                   | 2                                  | HTZ       |
| 19   | M   | 44  | c.475C>T                        | p.Arg159*                     | 1                                  | HTZ       |
| 20   | F   | 31  | c.1553delT                      | p.Leu518Tyrfs*16              | 1                                  | HTZ       |
| 21   | F   | 18  | c.2363G>A                       | p.Arg788Gln                   | 2                                  | HMZ       |
| 22   | M   | 39  | c.536+6T>C                      | p.?                           | 3                                  | HTZ       |
| 23   | F   | 44  | c.140G>A                        | p.Arg47Gln                    | 2                                  | HTZ       |
| 24   | M   | 23  | c.523A>G & c.3269+1G>A          | p.Thr175Ala & p.?             | 1                                  | HTZ & HTZ |
| 25   | F   | 33  | c.1712delT                      | p.Val571Aspfs*16              | 1                                  | HTZ       |
| 26   | F   | 38  | c.959C>T                        | p.Ser320Phe                   | 1                                  | HTZ       |
| 27   | M   | 47  | c.498C>T & c.2078delC           | p.Asp166Asp & p.Pro693Profs*5 | 1                                  | HTZ       |
| 28   | M   | 68  | c.140G>A                        | p.Arg47Gln                    | 2                                  | HMZ       |
| 29   | F   | 40  | c.3838C>T                       | p.*1280Arg ext                | 1                                  | HTZ       |
| 30   | F   | 28  | c.140G>A                        | p.Arg47Gln                    | 1                                  | HTZ       |
| 31   | M   | 57  | c.2324C>T & c.2836G>A           | p.Thr775Met & p.Ala946Thr     | 1                                  | HTZ & HTZ |
| 32   | M   | 29  | c.2405G>A                       | p.Trp802*                     | 1                                  | HTZ       |
| 33   | F   | 17  | c.140G>A                        | p.Arg47Gln                    | 2                                  | HTZ       |
| 34   | M   | 35  | c.1576G>T                       | p.Val526Phe                   | 1                                  | HTZ       |
| 35   | F   | 36  | c.959C>T                        | p.Ser320Phe                   | 1                                  | HTZ       |
| 36   | F   | 60  | c.578G>A                        | p.Gly193Glu                   | 2                                  | HTZ       |
| 37   | M   | 53  | c.202G>A                        | p.Gly68Arg                    | 1                                  | HTZ       |

|    |   |    |                       |                           |   |              |
|----|---|----|-----------------------|---------------------------|---|--------------|
| 38 | F | 9  | c.1296_1301del        | p.Cys433_Gly434del        | 1 | HTZ          |
| 39 | M | 29 | c.1327insA            | p.Cys433Argfs*7           | 1 | HTZ          |
| 40 | F | 50 | c.1896+6T>C           | p.?                       | 3 | HMZ          |
| 41 | F | 35 | c.79A>G               | p.Ser27Gly                | 1 | HTZ          |
| 42 | F | 51 | c.2800G>A             | p.Ala934Thr               | 1 | HTZ          |
| 43 | F | 25 | c.217C>G              | p.Leu73Val                | 1 | HTZ          |
| 44 | M | 14 | c.523A>G              | p.Thr175Ala               | 3 | HTZ          |
| 45 | F | 51 | c.1005+5G>A           | p.?                       | 3 | HTZ          |
| 46 | F | 28 | c.1778C>T             | p.Thr593Met               | 1 | HTZ          |
| 47 | F | 28 | c.959C>T              | p.Ser320Phe               | 1 | HTZ          |
| 48 | F | 39 | c.2800G>A             | p.Ala934Thr               | 1 | HTZ          |
| 49 | F | 41 | c.3081+5G>C           | p.?                       | 3 | HTZ          |
| 50 | M | 46 | c.1584G>C             | p.Glu528Asp               | 3 | HTZ          |
| 51 | F | 48 | c.1230+3A>C           | p.?                       | 3 | HTZ          |
| 52 | F | 44 | c.101C>T              | p.Thr34Met                | 1 | HTZ          |
| 53 | F | 36 | c.1327C>G & c.1769G>A | p.Gln443Glu & p.Arg590Gln | 1 | HTZ &<br>HTZ |
| 54 | F | 35 | c.2363G>A             | p.Arg788Gln               | 2 | HTZ          |
| 55 | F | 62 | c.523A>G              | p.Thr175Ala               | 3 | HTZ          |
| 56 | F | 42 | c.459T>C              | p.Phe153Phe               | 3 | HTZ          |
| 57 | F | 47 | c.1769G>A             | p.Arg590Gln               | 2 | HTZ          |
| 58 | M | 38 | c.524C>T              | p.Thr175Met               | 1 | HTZ          |
| 59 | F | 24 | c.1675C>A             | p.Ala559Thr               | 1 | HTZ          |
| 60 | F | 38 | c.1974G>A             | p.Trp658*                 | 1 | HTZ          |

\* 1: disease-causing ; 2: potentially pathogenic ; 3: of unknown significance
